# Supplementary material for: High-Resolution Linkage Map With Allele Dosage Allows the Identification of Regions Governing Complex Traits and Apospory in Guinea Grass (Megathyrsus maximus)
Source: Front Plant Sci. 2020 Feb 26;11:15. doi: 10.3389/fpls.2020.00015 (PMC7054243; doi:10.3389/fpls.2020.00015)
Supplement: Supplementary file 5 [file Table_1.docx]

**Table S1.** Reproductive mode of the hybrids from mapping population of guinea grass (*Megathyrsus maximus*).

| Genotype | RMa |  | Genotype | RM |  | Genotype | RM |  | Genotype | RM |
| --- | --- | --- | --- | --- | --- | --- | --- | --- | --- | --- |
| B01 | Apob | **B46** | Apo | **B102** | Sex | **C24** | Apo |
| B02 | Sexc | **B47** | Apo | **B103** | Sex | **C25** | Apo |
| B03 | NDd | **B48** | Apo | **B105** | ND | **C26** | Apo |
| B04 | ND | **B49** | Sex | **B108** | Apo | **C27** | Sex |
| B06 | Apo | **B50** | Sex | **B109** | Apo | **C28** | Sex |
| B07 | ND | **B51** | Apo | **B110** | Sex | **C30** | Sex |
| B10 | ND | **B66** | Apo | **B112** | ND | **C31** | ND |
| B11 | Apo | **B67** | Sex | **B113** | Sex | **C33** | Apo |
| B12 | Sex | **B68** | Apo | **B114** | Apo | **C34** | Apo |
| B13 | Sex | **B70** | Apo | **B115** | Apo | **C36** | Apo |
| B15 | ND | **B71** | ND | **B117** | Sex | **C37** | ND |
| B16 | ND | **B72** | Sex | **B118** | Sex | **C40** | Apo |
| B18 | Apo | **B73** | Apo | **B119** | ND | **C41** | Apo |
| B20 | Sex | **B74** | Sex | **B120** | Apo | **C43** | ND |
| B21 | Sex | **B75** | Sex | **B121** | ND | **C44** | Apo |
| B22 | Sex | **B76** | Apo | **B124** | Apo | **C45** | Sex |
| B23 | Sex | **B77** | ND | **B126** | Apo | **C47** | Sex |
| B24 | Apo | **B80** | ND | **B128** | Apo | **C48** | Sex |
| B25 | Sex | **B81** | Sex | **C02** | Apo | **C50** | ND |
| B27 | ND | **B83** | ND | **C03** | Apo | **C52** | Apo |
| B28 | Apo | **B84** | Sex | **C04** | Sex | **C53** | Apo |
| B31 | ND | **B85** | Sex | **C07** | Apo | **C54** | Sex |
| B33 | Sex | **B91** | Apo | **C09** | Apo | **C55** | Apo |
| B34 | Apo | **B92** | Apo | **C10** | Apo | **C57** | Apo |
| B35 | Sex | **B93** | Apo | **C12** | Apo | **C58** | Apo |
| B37 | Apo | **B94** | Apo | **C13** | Sex | **C59** | ND |
| B38 | Apo | **B95** | ND | **C14** | Apo | **C60** | Apo |
| B39 | ND | **B96** | Sex | **C15** | Apo | **C62** | Sex |
| B40 | Apo | **B97** | Apo | **C16** | Sex | **C63** | Apo |
| B41 | Apo | **B98** | ND | **C17** | Sex | **C64** | Apo |
| B42 | ND | **B99** | Apo | **C21** | Apo | **C65** | Sex |
| B44 | Apo | **B100** | Apo | **C22** | Sex | **C66** | Sex |
| B45 | Apo | **B101** | Apo | **C23** | Apo | **C90** | ND |

aReproductive mode; bApomictic; cSexual; dNot determined.
