# Supplementary material for: High-Resolution Linkage Map With Allele Dosage Allows the Identification of Regions Governing Complex Traits and Apospory in Guinea Grass (Megathyrsus maximus)
Source: Front Plant Sci. 2020 Feb 26;11:15. doi: 10.3389/fpls.2020.00015 (PMC7054243; doi:10.3389/fpls.2020.00015)
Supplement: Supplementary file 9 [file Table_5.xlsx]

## Sheet: Plan1
High-resolution Linkage Map with Allele Dosage Allows the Identification of Regions Governing Complex Traits and Apospory in Guinea Grass (Megathyrsus maximus)
Thamiris G. Deo1, Rebecca C. U. Ferreira1, Leticia A. C. Lara2, Antonio A. F. Garcia2, Mateus F. Santos3, Liana Jank3, Anete P. Souza1,4
1Center for Molecular Biology and Genetic Engineering, University of Campinas, Campinas, Brazil
2Genetics Department, Escola Superior de Agricultura “Luiz de Queiroz”, University of São Paulo, Piracicaba, Brazil
3Embrapa Beef Cattle, Brazilian Agricultural Research Corporation, Campo Grande, Brazil
4Plant Biology Department, Biology Institute, University of Campinas, Campinas, Brazil
* Correspondence: Anete Pereira de Souza (anete@unicamp.br)
Description and function of the genes identified in apomixis and QTL regions from linkage map of guinea grass.
Table S5. Genes identified in the apomixis and QTLs regions based on similarity to the Panicum virgatum genome.
HG	Regions	Name	Gene	Description
I	1	qNDF_L10	Pavir.1KG151000	RHOMBOID FAMILY PROTEIN
		qNDF_S15	AT5G38510	Rhomboid-related intramembrane serine protease family protein
			OsRhmbd6	Putative Rhomboid homologue
I	2	qADF_L20	AT1G70940/AT1G77110/AT5G16530/AT5G15100/AT5G57090	Auxin efflux carrier family protein
		qCEL_L30	Os02g50960/Os12g04000/Os08g41720	Auxin efflux carrier component
			AT1G78900	vacuolar ATP synthase subunit A
			Os06g43680	palmitoyltransferase TIP1
			Pavir.4KG247000	PHOSPHOENOLPYRUVATE CARBOXYLASE
			Os01g02050	PHOSPHOENOLPYRUVATE CARBOXYLASE
			Os06g39640	PINHEAD
			AT1G15690	Inorganic H pyrophosphatase family protein
			Os02g09150	Inorganic H+ pyrophosphatase
I	3	qOM_S3	AT3G02620/AT3G02610/AT3G02630	Plant stearoyl-acyl-carrier-protein desaturase family protein
			Os08g10010/Os04g31070	acyl-desaturase_chloroplast precursor
			Pavir.1NG248700	EXOCYST COMPLEX PROTEIN EXO70
			AT5G50380	exocyst subunit exo70 family protein F1
			AT1G72470	exocyst subunit exo70 family protein D1
			AT1G54090	exocyst subunit exo70 family protein D2
			AT3G14090	exocyst subunit exo70 family protein D3
			Os02g30230/Os01g69230/Os08g41820	exo70 exocyst complex subunit domain containing protein
II	4	Apo-locus	AT3G43610	Spc97 / Spc98 family of spindle pole body (SBP) component
			Pavir.6KG334200.1	Inner centromere protein, ARK binding region (INCENP_ARK-bind)
			AT1G71830	Somatic embryogenesis receptor-like kinase 1 (SERK)
II	5	qNDF_L11	Pavir.5NG291500.1	Wall-associated receptor kinase galacturonan-binding (GUB_WAK_bind)
		qNDF_S16	Pavir.6KG334900	RING/U-box domain-containing protein (XERICO)
			AT3G19430/AT5G54370/AT5G60520	Late embryogenesis abundant (LEA) protein-related
II	6	qTDM3	Pavir.3KG465900	WRKY TRANSCRIPTION FACTOR 3-RELATED
		qRC9	Pavir.3KG466000	cell cycle arrest protein BUB3 (BUB3) // translation initiation factor 5A (EIF5A)
			AT1G13950	eukaryotic elongation factor 5A-1
			AT4G26640	WRKY family transcription factor family protein
			AT5G56270	WRKY DNA-binding protein 2
			AT1G13960	WRKY DNA-binding protein 4
			AT5G07100	WRKY DNA-binding protein 26
			AT2G38470	WRKY DNA-binding protein 33
			AT3G01080	WRKY DNA-binding protein 58
			Os01g61080	WRKY24
			Os04g39570	WRKY35
			Os05g27730	WRKY53
			Os03g33012	WRKY81
III	7	qIVD_L27	Pavir.1NG033800	Glycosyltransferase
			AT2G41640/AT3G18170/AT3G10320/AT3G57380	Glycosyltransferase family 61 protein
			Os10g35020/Os02g22650/Os06g49320	Glycosyltransferase
III	8	qCP_L6	Pavir.1NG040300	xyloglucan:xyloglucosyl transferase
		qNDF_L12	AT1G11545	xyloglucan endotransglucosylase/hydrolase 8
		qNDF_S17	AT1G14720	xyloglucan endotransglucosylase/hydrolase 28
			AT4G18990	xyloglucan endotransglucosylase/hydrolase 29
			AT1G32170	xyloglucan endotransglucosylase/hydrolase 30
			AT1G10550	xyloglucan:xyloglucosyl transferase 33
III	9	qPL_L33	Pavir.2KG486900	PROTEIN THYLAKOID FORMATION 1, CHLOROPLASTIC
			Pavir.2NG571900	Secoisolariciresinol dehydrogenase
			AT2G14900/AT2G39540/AT5G59845	Gibberellin-regulated family protein
			AT3G02885	GAST1 protein homolog 5
			Os10g02625	Gibberellin regulated protein
			Os03g41060	GASR2 - Gibberellin-regulated GASA/GAST/Snakin family protein precursor
			Os03g55290	GASR3 - Gibberellin-regulated GASA/GAST/Snakin family protein precursor
			Os07g40240	GASR9 - Gibberellin-regulated GASA/GAST/Snakin family protein precursor
			AT4G03140/AT3G26760/AT3G26770/AT3G51680	NAD(P)-binding Rossmann-fold superfamily protein
III	10	qSIL_L35	Pavir.2NG549800	LEUCINE-RICH REPEAT-CONTAINING PROTEIN
			Os01g72680/Os09g14100	Disease resistance protein RPS2
			AT1G12220	Disease resistance protein (CC-NBS-LRR class) family
			Os03g14900/Os12g10410	NB-ARC/LRR disease resistance protein
			Os11g37880/Os11g37850/Os11g37774	Stripe rust resistance protein
IV	11	qPLB8	Pavir.7KG092300	Ent-copalyl diphosphate synthase
		qNDF_L13	AT5G67440/AT5G64330	Phototropic-responsive NPH3 family protein
		qNDF_S18
V	12	qCP_S8	Pavir.5KG199700	Glucuronokinase
		qIVD_S28	AT3G01640	Glucuronokinase G
			Pavir.5NG207200	WRKY DNA-binding domain
			Os01g18584	WRKY9
			Os02g53100	WRKY32
			AT1G68150	WRKY DNA-binding protein 9
			AT4G04450	WRKY family transcription factor
			Os05g04640	WRKY5
			Os05g49210	WRKY43
			Os01g14440	WRKY1
			AT1G62300	WRKY family transcription factor
			AT4G22070	WRKY DNA-binding protein 31
			AT4G01720	WRKY family transcription factor
			AT1G18860	WRKY DNA-binding protein 61
			AT3G62150	P-glycoprotein 21
			AT1G02530	P-glycoprotein 12
			AT1G02520	P-glycoprotein 11
			AT4G01830	P-glycoprotein 5
			AT5G46540	P-glycoprotein 7
			AT4G01820	P-glycoprotein 3
			AT3G28380	P-glycoprotein 17
			AT1G10680	P-glycoprotein 10
			AT4G25960	P-glycoprotein 2
			AT1G27940	P-glycoprotein 13
			Pavir.5NG245000	PROTEIN NRT1/ PTR FAMILY 6.2
			Os02g48570/Os01g04950/Os04g36040	Peptide transporter PTR2
			AT2G23610	methyl esterase 3
			AT2G23580	methyl esterase 4
			AT2G23560	methyl esterase 7
			AT2G23550	methyl esterase 6
			AT4G37150	methyl esterase 9
			AT2G23590	methyl esterase 8
			AT2G23620	methyl esterase 1
V	13	qADF_S23	AT4G01070/AT2G18570/AT5G66690/AT2G18560/AT2G18570/AT5G66690	UDP-Glycosyltransferase superfamily protein
			Os02g14680/Os02g14590/Os02g14540	UDP-glucoronosyl and UDP-glucosyl transferase domain containing protein
V	14	qGM1	Pavir.5NG490300	EARLY NODULIN-LIKE PROTEIN 3-RELATED
		qTDM4	Pavir.5NG490600	HEXOKINASE
		qLDM5	Pavir.5NG491000	Pectinesterase / Pectin methylesterase
		qSDM7	Pavir.5NG491300	MALIC ENZYME
		qCP_L7	AT1G62750	Translation elongation factor EFG/EF2 protein
		qADF_L21	AT4G27520	Early nodulin-like protein 2
			Os06g46740	Early nodulin 20 precursor
			AT5G53870	Early nodulin-like protein 1
			AT2G25060	Early nodulin-like protein 14
			AT4G32490	Early nodulin-like protein 4
			Os01g53930/Os05g44760/Os05g45590/Os05g09500/Os05g31110/Os01g52450/Os01g09460/Os07g09890	Hexokinase
			AT4G29130	Hexokinase 1
			AT1G47840	Hexokinase 3
			AT3G20040	Hexokinase
			AT4G37840	Hexokinase-like 3
			AT2G19860	Hexokinase 2
			Os01g53990/Os05g44600/Os01g44340/Os04g46740/Os08g10604/Os01g19440	Pectinesterase
			AT2G21610	Pectinesterase 11
			AT3G29090	Pectin methylesterase 31
			Os07g31380/Os05g09440/Os10g35960	NAD-dependent malic enzyme_mitochondrial precursor
			Os01g54030/Os02g44550/Os01g52500	NADP-dependent malic enzyme
			AT2G19900	NADP-malic enzyme 1
			AT1G79750	NADP-malic enzyme 4
			AT4G00570	NAD-dependent malic enzyme 2
			AT5G25880	NADP-malic enzyme 3
			AT5G11670	NADP-malic enzyme 2
			AT2G13560	NAD-dependent malic enzyme 1
			Os01g09320	NADP-dependent malic enzyme_chloroplast precursor
V	15	qOM_L1	Pavir.5KG761500	EF-HAND CALCIUM-BINDING DOMAIN CONTAINING PROTEIN
			AT4G12860	Calcium-binding EF-hand family protein
VI	16	qOM_L2	AT1G65060	4-coumarate:CoA ligase 3
		qADF_L22	AT3G21240	4-coumarate:CoA ligase 2
VI	17	qGM2	Pavir.8NG293200	Galactinol--raffinose galactosyltransferase / Stachyose synthetase
		qLDM6	Os07g09010/Os10g08850/Os03g58580/Os12g44060/Os12g44060/Os12g44070/Os08g42010/Os03g58580/Os07g09010/Os12g29950	Nodulin
		qRC10	Os03g47810	Nodulin family protein
		qADF_S24	AT1G74780	Nodulin-like / Major Facilitator Superfamily protein
			Pavir.8KG076200	ALPHA-DIOXYGENASE 2
			AT3G01420	Peroxidase superfamily protein
			AT1G73680	Alpha dioxygenase
VII	18	qSIL_L36	Pavir.9NG559100	PEPTIDYL-PROLYL CIS-TRANS ISOMERASE PASTICCINO1
			AT3G54010	FKBP-type peptidyl-prolyl cis-trans isomerase family protein
			Os03g25140	Peptidyl-prolyl isomerase PASTICCINO1
VII	19	qOM_S4	Pavir.9KG151500	Chloroplast envelope transporter
		qNDF_L14	Pavir.9KG151700	Endo-1,4-beta-xylanase
		qNDF_S19	Pavir.9KG151800	ALPHA-GALACTOSIDASE 1
			AT1G58370/AT4G08160/AT1G58370/AT1G10050/AT4G38650	Glycosyl hydrolase family 10 protein / carbohydrate-binding domain-containing protein
			Os05g23350/Os01g04300/Os05g25560	Glycosyl hydrolase family 10 protein
			Os10g35110/Os07g48160/Os10g35070/Os07g26900/Os10g35070/Os07g26900/Os07g48160/Os10g35110	Alpha-galactosidase precursor
			AT5G08370/AT5G08370	Alpha-galactosidase 2
			AT5G08380/AT5G08380	Alpha-galactosidase 1
VII	20	qADF_S25	Pavir.9NG150900	Linoleate 9S-lipoxygenase / Linoleate 9-lipoxygenase
			Os03g49380/Os12g37350/Os03g52860/Os03g49260/Os05g23880/Os08g39850/Os11g36719/Os03g49380	lipoxygenase
			Os06g04420/Os02g19790	lipoxygenase 4
			AT3G45140	lipoxygenase 2
			AT1G55020/AT1G55020	lipoxygenase 1
			AT1G17420/AT1G17420	lipoxygenase 3
VIII	21	qCP_S9	Pavir.6KG366500	3-oxoacyl-[acyl-carrier-protein] reductase
		qIVD_S29	Pavir.6KG367000	Sugar transporter/spinster transmembrane protein
		qPL_S34	Pavir.6KG367600	ethylene-insensitive protein 3
			Os08g39830/Os03g20780/Os07g48630	Ethylene-insensitive 3
			AT1G73730	ETHYLENE-INSENSITIVE3-like 3
			AT5G10120	Ethylene insensitive 3 family protein
			AT3G20770	Ethylene insensitive 3
			Os10g02800	Glycine-rich cell wall structural transmembrane protein
			AT2G17845/AT3G55310/AT3G55290/AT1G62610	NAD(P)-binding Rossmann-fold superfamily protein
			LOC_Os08g39960/Os04g30760/Os12g13930	3-oxoacyl-reductase_chloroplast precursor
VIII	22	qOM_S5	Pavir.6KG306400	STEROL REGULATORY ELEMENT-BINDING PROTEIN
		qADF_S26	Pavir.6KG306300	ALPHA CARBONIC ANHYDRASE 5
		qCEL_S31	AT1G08065	Alpha carbonic anhydrase 5
			AT2G28210	Alpha carbonic anhydrase 2
			AT4G20990	Alpha carbonic anhydrase 4
			AT1G08080	Alpha carbonic anhydrase 7
			AT2G26420	Phosphatidylinositol-4-phosphate 5-kinase 3
			Os03g24160/Os07g46490/AT2G26420	Phosphatidylinositol-4-phosphate 5-kinase
VIII	23	qSIL_S37	Pavir.6NG098000	PECTINESTERASE 8
			Os08g10604/Os05g44600/Os01g44340/Os07g41650/Os09g39760/Os01g53990	pectinesterase
